# Supplementary material for: Association of Single-Nucleotide Polymorphisms in Interleukin Genes with Microbial Keratitis in a South Indian Population
Source: MDPI journal article supplement (doi:10.3390/pathogens11111387), 2022-11-20
Supplement: s1 [file s1]

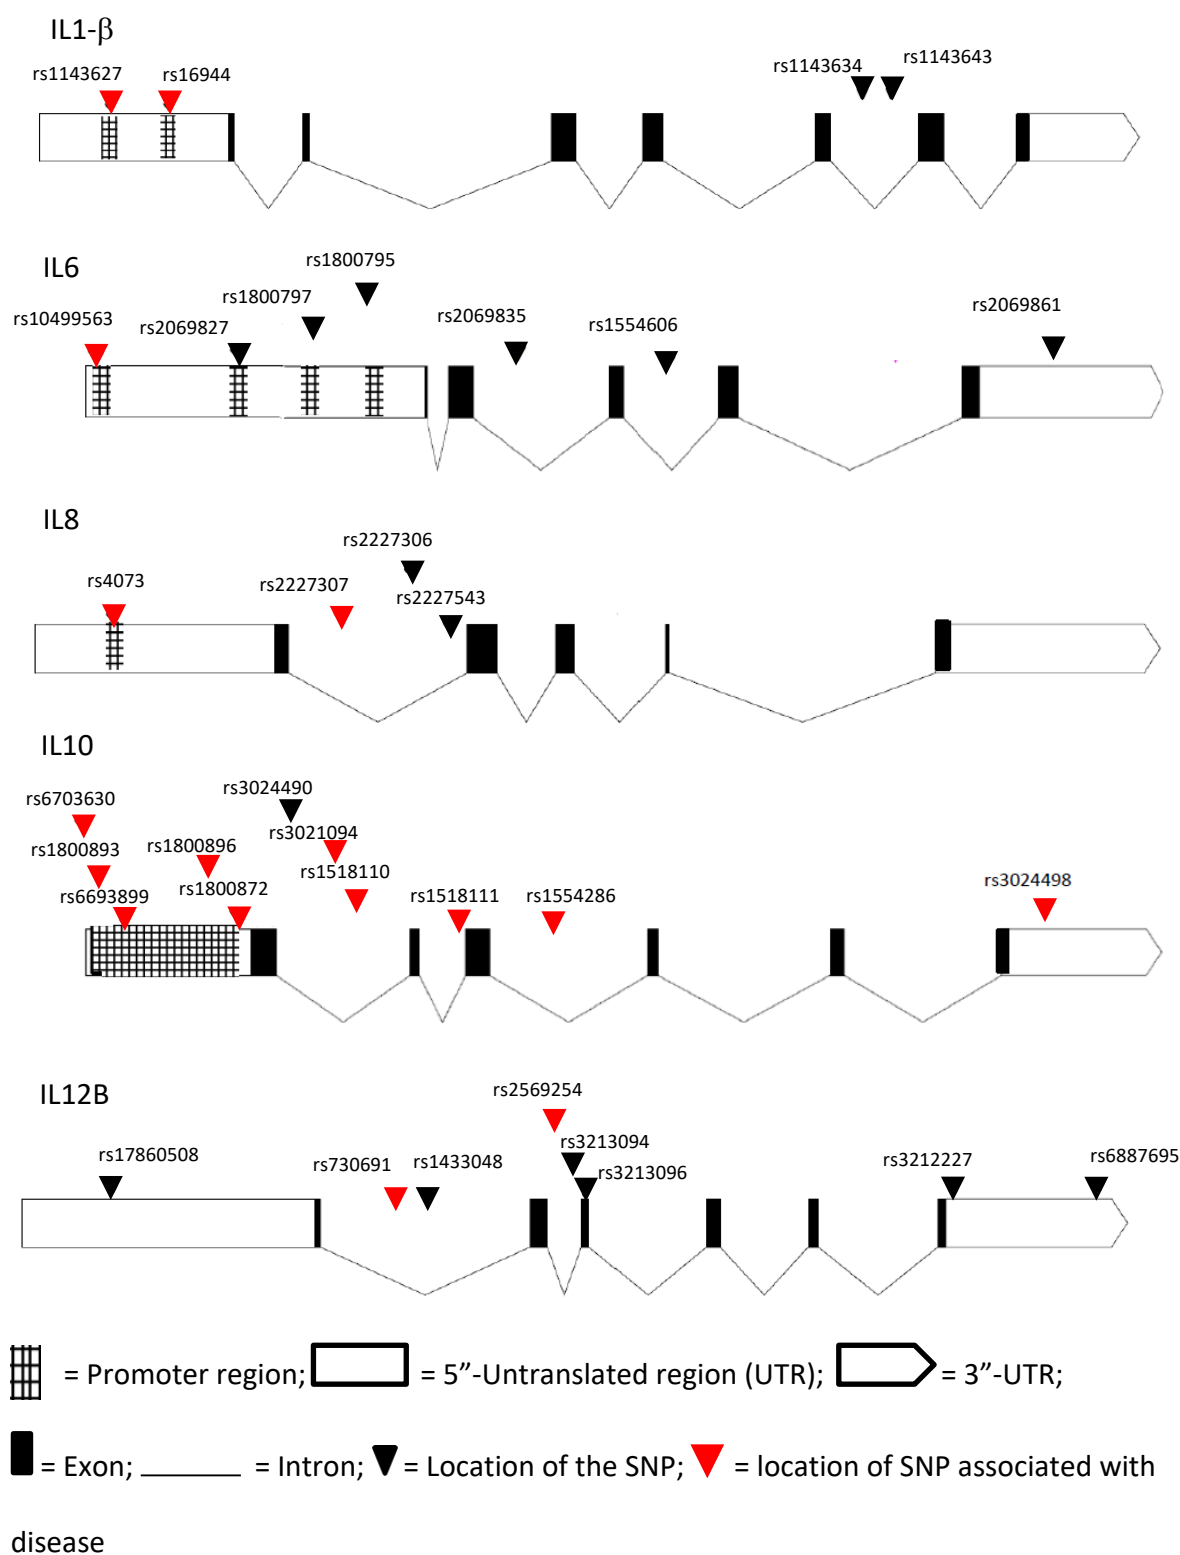

**Figure S1.** Location of SNPs within the interleukin genes.

**Supplementary Table S1.** Candidate SNPs that were screened with their reliability values.

| Gene name    | rs id      | Genomic change | Average GenTrain score | Average call rate score |
|--------------|------------|----------------|------------------------|-------------------------|
| <i>IL1B</i>  |            |                |                        |                         |
|              | rs1143643  | C>T            | 0.77                   | 0.99                    |
|              | rs78226748 | C>A            | 0.85                   | 0.99                    |
|              | rs1143634  | G>A            | 0.76                   | 0.99                    |
|              | rs1143627  | G>A            | 0.82                   | 0.99                    |
|              | rs16944    | A>G            | 0.85                   | 0.99                    |
| <i>IL6</i>   |            |                |                        |                         |
|              | rs10499563 | T>C            | 0.77                   | 0.99                    |
|              | rs2069827  | G>T            | 0.74                   | 0.99                    |
|              | rs1800797  | A>G            | 0.70                   | 0.99                    |
|              | rs1800795  | C>G            | 0.89                   | 0.99                    |
|              | rs2069835  | T>C            | 0.8                    | 1.00                    |
|              | rs1554606  | T>G            | 0.80                   | 0.99                    |
|              | rs11544633 | T>C            | 0.81                   | 1.00                    |
|              | rs34012176 | dupC           | 0.82                   | 0.99                    |
|              | rs2069861  | C>T            | 0.74                   | 1.00                    |
| <i>IL8</i>   |            |                |                        |                         |
|              | rs2227532  | T>C            | 0.85                   | 0.99                    |
|              | rs4073     | A>T            | 0.88                   | 0.99                    |
|              | rs2227307  | G>T            | 0.72                   | 0.99                    |
|              | rs2227306  | C>T            | 0.69                   | 0.98                    |
|              | rs2227543  | C>T            | 0.84                   | 0.98                    |
| <i>IL10</i>  |            |                |                        |                         |
|              | rs3024498  | T>C            | 0.76                   | 0.99                    |
|              | rs1554286  | A>G            | 0.81                   | 0.99                    |
|              | rs1518111  | T>C            | 0.74                   | 0.99                    |
|              | rs1518110  | A>C            | 0.72                   | 0.99                    |
|              | rs3021094  | T>G            | 0.87                   | 0.99                    |
|              | rs1800872  | T>G            | 0.83                   | 0.99                    |
|              | rs1800896  | T>C            | 0.85                   | 0.98                    |
|              | rs1800893  | C>T            | 0.68                   | 0.74                    |
|              | *rs6693899 | G>T            | NA                     | NA                      |
|              | *rs6703630 | C>T            | NA                     | NA                      |
| <i>IL12B</i> |            |                |                        |                         |
|              | rs3212227  | T>G            | 0.75                   | 0.99                    |
|              | rs3213119  | C>A            | 0.76                   | 0.98                    |
|              | rs74644143 | C>T            | 0.85                   | 0.78                    |
|              | rs79446920 | C>T            | 0.75                   | 0.99                    |
|              | rs10045130 | C>T            | 0.80                   | 0.99                    |
|              | rs3213096  | C>T            | 0.81                   | 0.99                    |
|              | rs3213094  | C>T            | 0.80                   | 1.00                    |
|              | rs2569254  | C>T            | 0.84                   | 0.99                    |
|              | rs1433048  | G>A            | 0.74                   | 0.99                    |
|              | rs730691   | T>C            | 0.73                   | 0.99                    |
|              | rs17860508 | TTAGAG>GC      | 0.64                   | 0.99                    |
|              | rs6887695  | G>C            | 0.85                   | 1.00                    |

\*SNPs rs6693899 and rs6703630 were screened using sequencing on an automated DNA sequencer rather than the GoldenGate system and so lack GenTrain and Call rates. The SNPs highlighted in grey cells were either monomorphic (i.e. no-one had variations in the screened population) or had improper data clustering in the GoldenGate® assay (IL12B rs3213096 only) and so were excluded from further analysis. IL - interleukin; rs id - Reference SNP cluster identification; GenTrain score was computed from the GenTrain 2.0 clustering algorithm; Call rate score = the ratio of a number of genotypes exceeding the threshold value to the total number of genotypes. Both GenTrain and Call rate scores were provided by the manufacturer Illumina. A GenTrain score or Call Rate of above 0.7 usually indicates well-behaving genotypes.

**Supplementary Table S2.** Linkage disequilibrium between adjacent SNPs in each of the candidate genes.

| SNP1                          | SNP2      | Linkage disequilibrium (D') |
|-------------------------------|-----------|-----------------------------|
| <b>IL-1<math>\beta</math></b> |           |                             |
| rs1143643                     | rs1143634 | 1                           |
|                               | rs1143627 | 0.96                        |
|                               | rs16944   | 0.96                        |
| rs1143634                     | rs1143627 | 0.71                        |
|                               | rs16944   | 0.7                         |
| rs1143627                     | rs16944   | 1                           |
| <b>IL-6</b>                   |           |                             |
| rs10499563                    | rs2069827 | 1                           |
|                               | rs1800797 | 1                           |
|                               | rs1800795 | 1                           |
|                               | rs2069835 | 1                           |
|                               | rs1554606 | 0.77                        |
|                               | rs2069861 | 1                           |
| rs2069827                     | rs1800797 | 1                           |
|                               | rs1800795 | 1                           |
|                               | rs2069835 | 1                           |
|                               | rs1554606 | 1                           |
|                               | rs2069861 | 1                           |
| rs1800797                     | rs1800795 | 0.97                        |
|                               | rs2069835 | 1                           |
|                               | rs1554606 | 0.97                        |
|                               | rs2069861 | 1                           |
| rs1800795                     | rs2069835 | 1                           |
|                               | rs1554606 | 1                           |
|                               | rs2069861 | 1                           |
| rs2069835                     | rs1554606 | 1                           |
|                               | rs2069861 | 1                           |
| rs1554606                     | rs2069861 | 1                           |
| <b>IL-8</b>                   |           |                             |
| rs4073                        | rs2227307 | 1                           |
|                               | rs2227306 | 1                           |
|                               | rs2227543 | 1                           |
| rs2227307                     | rs2227306 | 1                           |
|                               | rs2227543 | 1                           |
| rs2227306                     | rs2227543 | 1                           |
| <b>IL-10</b>                  |           |                             |
| rs3024498                     | rs1554286 | 0.96                        |
|                               | rs1518111 | 1                           |
|                               | rs1518110 | 1                           |
|                               | rs3021094 | 1                           |
|                               | rs1800872 | 1                           |
|                               | rs1800896 | 1                           |
|                               | rs1800893 | 1                           |
|                               | rs6693899 | 0.87                        |
|                               | rs6703630 | 0.96                        |

|               |            |      |
|---------------|------------|------|
| rs1554286     | rs1518111  | 1    |
|               | rs1518110  | 1    |
|               | rs3021094  | 0.65 |
|               | rs1800872  | 1    |
|               | rs1800896  | 1    |
|               | rs1800893  | 1    |
|               | rs6693899  | 1    |
|               | rs6703630  | 1    |
| rs1518111     | rs1518110  | 0.97 |
|               | rs3021094  | 0.61 |
|               | rs1800872  | 1    |
|               | rs1800896  | 1    |
|               | rs1800893  | 1    |
|               | rs6693899  | 1    |
|               | rs6703630  | 1    |
| rs1518110     | rs3021094  | 0.63 |
|               | rs1800872  | 0.98 |
|               | rs1800896  | 1    |
|               | rs1800893  | 1    |
|               | rs6693899  | 0.93 |
|               | rs6703630  | 1    |
| rs3021094     | rs1800872  | 1    |
|               | rs1800896  | 1    |
|               | rs1800893  | 1    |
|               | rs6693899  | 1    |
|               | rs6703630  | 1    |
|               | rs1800872  | 1    |
| rs1800872     | rs1800893  | 1    |
|               | rs6693899  | 1    |
|               | rs6703630  | 1    |
|               | rs1800893  | 1    |
| rs1800896     | rs6693899  | 1    |
|               | rs6703630  | 1    |
|               | rs6693899  | 1    |
| rs1800893     | rs6703630  | 1    |
|               | rs6703630  | 1    |
| rs6693899     |            |      |
| <b>IL-12B</b> | rs3213094  | 1    |
| rs3212227     | rs2569254  | 1    |
|               | rs1433048  | 1    |
|               | rs730691   | 0.85 |
|               | rs17860508 | 0.92 |
|               | rs6887695  | 0.82 |
|               | rs2569254  | 1    |
| rs3213094     | rs1433048  | 1    |
|               | rs730691   | 0.86 |
|               | rs17860508 | 0.92 |
|               | rs6887695  | 0.63 |
|               | rs1433048  | 0.79 |

|           |            |      |
|-----------|------------|------|
| rs2569254 | rs730691   | 1    |
|           | rs17860508 | 0.07 |
|           | rs6887695  | 0.51 |
|           | rs730691   | 0.79 |
| rs1433048 | rs17860508 | 0.15 |
|           | rs6887695  | 0.51 |
|           | rs17860508 | 1    |
| rs730691  | rs6887695  | 0.61 |
|           | rs6887695  | 1    |

**Supplementary Table S3.** Differences in the frequency of interleukin SNPs for all cases versus controls.

| Gene                         | rs ID      | Allele / Genotype | Frequency (%) |                  | $\chi^2$ value | Corrected P value | OR (95% CI)                 |
|------------------------------|------------|-------------------|---------------|------------------|----------------|-------------------|-----------------------------|
|                              |            |                   | Cases (N=145) | Controls (N=189) |                |                   |                             |
| <i>IL1<math>\beta</math></i> | rs1143643  | C                 | 71.7          | 77.2             |                |                   | Reference                   |
|                              |            | T                 | 28.3          | 22.8             | 0.1998         | 0.2               | 0.75 (0.45, 1.23)           |
|                              |            | CC                | 51.7          | 58.7             |                |                   | Reference                   |
|                              |            | CT                | 39.3          | 36.5             | 0.743          | 0.3796            | 1.223 (0.774, 1.931)        |
|                              |            | TT                | 9             | 4.8              | 2.744          | 0.1079            | 2.138 (0.870, 5.253)        |
|                              | rs1143634  | G                 | 86.9          | 84.1             |                |                   | Reference                   |
|                              |            | A                 | 13.1          | 15.9             | 0.317          | 0.4236            | 1.25 (0.67, 2.33)           |
|                              |            | GG                | 75.2          | 71.4             |                |                   | Reference                   |
|                              |            | GA                | 22.8          | 24.9             | 0.286          | 0.5964            | 0.870 (0.521, 1.451)        |
|                              |            | AA                | 2.1           | 3.7              | 0.814          | 0.3686            | 0.531 (0.134, 2.101)        |
|                              | rs1143627  | G                 | 59.3          | 64               |                |                   | Reference                   |
|                              |            | A                 | 40.7          | 36               | 1.392          | 0.4565            | 0.82 (0.52, 1.28)           |
|                              |            | GG                | 37.9          | 38.6             |                |                   | Reference                   |
|                              |            | GA                | 42.1          | 50.8             | 0.494          | 0.4835            | 0.843 (0.525, 1.356)        |
|                              |            | <b>AA</b>         | <b>20</b>     | <b>10.6</b>      | <b>3.683</b>   | <b>0.0639</b>     | <b>1.925 (0.986, 3.756)</b> |
|                              | rs16944    | A                 | 58.6          | 64               |                |                   | Reference                   |
|                              |            | G                 | 41.4          | 36               | 1.343          | 0.3107            | 1.26 (0.81, 1.96)           |
|                              |            | AA                | 37.2          | 38.6             |                |                   | Reference                   |
|                              |            | AG                | 42.8          | 51.3             | 0.364          | 0.5325            | 0.864 (0.538, 1.389)        |
|                              |            | <b>GG</b>         | <b>20</b>     | <b>10.1</b>      | <b>4.397</b>   | <b>0.036</b>      | <b>2.063 (1.048, 4.061)</b> |
| <i>IL6</i>                   | rs10499563 | T                 | 80            | 81.5             |                |                   | Reference                   |
|                              |            | C                 | 20            | 18.5             | 0.034          | 0.7792            | 1.10 (0.64, 1.90)           |
|                              |            | TT                | 65.5          | 64.6             |                |                   | Reference                   |
|                              |            | TC                | 29.7          | 33.9             | 0.378          | 0.5574            | 0.863 (0.539, 1.381_)       |
|                              |            | CC                | 4.8           | 1.6              | 2.434          | 0.1019            | 2.996 (0.755, 11.897)       |
|                              | rs2069827  | G                 | 96.6          | 96.8             |                |                   | Reference                   |
|                              |            | T                 | 3.4           | 3.2              | 0.019          | 0.89              | 1.089 (0.326, 3.642)        |
|                              |            | GG                | 93.1          | 94.2             |                |                   | Reference                   |
|                              |            | GT                | 6.9           | 5.8              | 0.161          | 0.6623            | 1.199 (0.495, 2.905)        |
|                              |            | TT                | 0             | 0                | -              | -                 | -                           |
|                              | rs1800797  | G                 | 86.9          | 85.7             |                |                   | Reference                   |
|                              |            | A                 | 13.1          | 14.3             | 0.097          | 0.8921            | 1.11 (0.59, 2.08)           |
|                              |            | GG                | 77.2          | 73               |                |                   | Reference                   |
|                              |            | AG                | 19.3          | 25.4             | 0.27           | 0.2218            | 0.719 (0.424, 1.219)        |
|                              |            | AA                | 3.4           | 1.6              | 0.741          | 0.3926            | 2.054 (0.480, 8.790)        |
|                              | rs1800795  | G                 | 88.3          | 85.2             |                |                   | Reference                   |

|      |           |           |             |             |              |               |                             |
|------|-----------|-----------|-------------|-------------|--------------|---------------|-----------------------------|
|      |           | C         | 11.7        | 14.8        | 0.67         | 0.4136        | 0.76 (0.40, 1.46)           |
|      |           | GG        | 80          | 72          |              |               | Reference                   |
|      |           | GC        | <b>16.6</b> | <b>26.5</b> | <b>4.257</b> | <b>0.046</b>  | <b>0.563 (0.326, 0.972)</b> |
|      |           | CC        | 3.4         | 1.6         | 0.817        | 0.4535        | 1.954 (0.457, 8.352)        |
|      | rs2069835 | T         | 93.8        | 95.8        |              |               | Reference                   |
|      |           | C         | 6.2         | 4.2         | 0.654        | 0.6314        | 1.32 (0.51, 3.42)           |
|      |           | TT        | 89.7        | 91          |              |               | Reference                   |
|      |           | TC        | 9           | 9           | 0.001        | 0.8981        | 1.012 (0.474, 2.157)        |
|      |           | CC        | 1.4         | 0           | -            | -             | -                           |
|      | rs1554606 | G         | 82.1        | 82          |              |               | Reference                   |
|      |           | T         | 17.9        | 18          | 0            | 0.8881        | 1.00 (0.57, 1.76)           |
|      |           | GG        | 70.3        | 66.7        |              |               | Reference                   |
|      |           | GT        | 23.4        | 30.7        | 1.618        | 0.1888        | 0.724 (0.440, 1.191)        |
|      |           | TT        | 6.2         | 2.6         | 1.942        | 0.1678        | 2.224 (0.723, 6.842)        |
|      | rs2069861 | C         | 98.6        | 98.4        |              |               | Reference                   |
|      |           | T         | 1.4         | 1.6         | 0.024        | 0.877         | 0.867 (0.143, 5.259)        |
|      |           | CC        | 97.2        | 97.4        |              |               | Reference                   |
|      |           | CT        | 2.8         | 2.6         | 0.004        | 0.95          | 1.044 (0.275, 3.959)        |
|      |           | TT        | 0           | 0           | -            | -             | -                           |
| IL8  | rs4073    | A         | 64.8        | 59.3        |              |               | Reference                   |
|      |           | T         | 35.2        | 40.7        | 0.605        | 0.3147        | 0.79 (0.50, 1.23)           |
|      |           | AA        | 39.3        | 37.6        |              |               | Reference                   |
|      |           | AT        | 51.7        | 43.9        | 0.245        | 0.6144        | 1.126 (0.705, 1.797)        |
|      |           | TT        | <b>9</b>    | <b>18.5</b> | <b>4.333</b> | <b>0.041</b>  | <b>0.463 (0.224, 0.956)</b> |
|      | rs2227307 | T         | 66.9        | 64          |              |               | Reference                   |
|      |           | G         | 33.1        | 36          | 0.102        | 0.5794        | 0.88 (0.56, 1.39)           |
|      |           | TT        | 41.4        | 43.4        |              |               | Reference                   |
|      |           | TG        | 51          | 41.3        | 1.222        | 0.2777        | 1.297 (0.818, 2.055)        |
|      |           | <b>GG</b> | <b>7.6</b>  | <b>15.3</b> | <b>2.799</b> | <b>0.0929</b> | <b>0.518 (0.240, 1.119)</b> |
|      | rs2227306 | C         | 79.3        | 77.8        |              |               | Reference                   |
|      |           | T         | 20.7        | 22.2        | 0.803        | 0.6893        | 1.10 (0.65, 1.86)           |
|      |           | CC        | 62.1        | 63          |              |               | Reference                   |
|      |           | CT        | 34.5        | 29.6        | 0.48         | 0.4975        | 1.181 (0.738, 1.888)        |
|      |           | TT        | 3.4         | 7.4         | 1.935        | 0.1598        | 0.472 (0.164, 1.359)        |
|      | rs2227543 | C         | 70.3        | 66.1        |              |               | Reference                   |
|      |           | T         | 29.7        | 33.9        | 0.046        | 0.4156        | 1.21 (0.76, 1.94)           |
|      |           | CC        | 46.9        | 46          |              |               | Reference                   |
|      |           | CT        | 46.2        | 40.2        | 0.267        | 0.6134        | 1.128 (0.714, 1.781)        |
|      |           | <b>TT</b> | <b>6.9</b>  | <b>13.8</b> | <b>3.054</b> | <b>0.0879</b> | <b>0.492 (0.222, 1.090)</b> |
| IL10 | rs3024498 | T         | 90.3        | 91          |              |               | Reference                   |
|      |           | C         | 9.7         | 9           | 0.042        | 0.6863        | 1.08 (0.51, 2.27)           |



|  |           |    |      |      |       |        |                       |
|--|-----------|----|------|------|-------|--------|-----------------------|
|  |           | TT | 82.8 | 82.5 |       |        | Reference             |
|  |           | TC | 15.2 | 16.9 | 0.138 | 0.7423 | 0.894 (0.494, 1.617)  |
|  |           | CC | 2.1  | 0.5  | 1.374 | 0.1379 | 3.900 (0.401, 37.96)  |
|  | rs1554286 | G  | 56.6 | 58.2 |       |        | Reference             |
|  |           | A  | 43.2 | 41.8 | 0.006 | 0.8262 | 0.93 (0.60, 1.45)     |
|  |           | GG | 34.5 | 35.4 |       |        | Reference             |
|  |           | GA | 43.5 | 45   | 0.001 | 0.977  | 0.993 (0.608, 1.622)  |
|  |           | AA | 22.1 | 19.6 | 0.233 | 0.6503 | 1.159 (0.637, 2.108)  |
|  | rs1518111 | C  | 52.4 | 56.1 |       |        | Reference             |
|  |           | T  | 47.6 | 43.9 | 0.326 | 0.5335 | 0.86 (0.56, 1.33)     |
|  |           | CC | 31.7 | 31.7 |       |        | Reference             |
|  |           | CT | 41.4 | 48.1 | 0.344 | 0.5644 | 0.860 (0.520, 1.423)  |
|  |           | TT | 26.9 | 20.1 | 0.942 | 0.3277 | 1.339 (0.743, 2.413)  |
|  | rs1518110 | C  | 52.4 | 56.1 |       |        | Reference             |
|  |           | A  | 47.6 | 43.9 | 0.446 | 0.5514 | 0.86 (0.56, 1.33)     |
|  |           | CC | 30.3 | 31.2 |       |        | Reference             |
|  |           | CA | 44.1 | 49.2 | 0.098 | 0.1938 | 0.923 (0.558, 1.527)  |
|  |           | AA | 25.5 | 19.6 | 0.918 | 0.3307 | 1.341 (0.736, 2.443)  |
|  | rs3021094 | T  | 89   | 90.5 |       |        | Reference             |
|  |           | G  | 11   | 9.5  | 2.878 | 0.7413 | 1.18 (0.58, 2.40)     |
|  |           | TT | 80   | 82   |       |        | Reference             |
|  |           | TG | 18.6 | 17.5 | 0.096 | 0.7483 | 1.093 (0.623, 1.919)  |
|  |           | GG | 1.4  | 0.5  | 0.638 | 0.1049 | 2.672 (0.239, 29.829) |
|  | rs1800872 | G  | 50.3 | 54.5 |       |        | Reference             |
|  |           | T  | 49.7 | 45.5 | 0.567 | 0.3996 | 0.85 (0.55, 1.31)     |
|  |           | GG | 27.6 | 30.2 |       |        | Reference             |
|  |           | GT | 45.5 | 48.1 | 0.016 | 0.3227 | 1.034 (0.747, 2.461)  |
|  |           | TT | 26.9 | 21.7 | 0.999 | 0.2867 | 1.355 (0.747, 1.727)  |
|  | rs1800896 | T  | 77.2 | 78.3 |       |        | Reference             |
|  |           | C  | 22.8 | 21.7 | 0.054 | 0.9011 | 1.06 (0.63, 1.79)     |
|  |           | TT | 60   | 60.8 |       |        | Reference             |
|  |           | TC | 34.5 | 34.9 | 0     | 0.982  | 1.001 (0.631, 1.588)  |
|  |           | CC | 5.5  | 4.2  | 0.288 | 0.5854 | 1.322 (0.477, 3.661)  |
|  | rs1800893 | C  | 75.9 | 78.3 |       |        | Reference             |
|  |           | T  | 24.1 | 21.7 | 2.241 | 0.5055 | 0.87 (0.52, 1.46)     |
|  |           | CC | 57.2 | 60.3 |       |        | Reference             |
|  |           | CT | 36.6 | 35.4 | 0.126 | 0.7502 | 1.085 (0.687, 1.718)  |
|  |           | TT | 6.2  | 4.2  | 0.737 | 0.3477 | 1.545 (0.572, 4.173)  |
|  | rs6693899 | G  | 78.6 | 83.6 |       |        | Reference             |
|  |           | T  | 21.4 | 16.4 | 1.338 | 0.1978 | 1.39 (0.80, 2.41)     |
|  |           | GG | 64.1 | 71.4 |       |        | Reference             |

|       |            |           |              |              |              |               |                             |
|-------|------------|-----------|--------------|--------------|--------------|---------------|-----------------------------|
|       |            | GT        | 29           | 24.9         | 1.07         | 0.2967        | 1.297 (0.792, 2.124)        |
|       |            | TT        | 6.9          | 3.7          | 2.038        | 0.1518        | 2.074 (0.762, 5.645)        |
|       | rs6703630  | C         | 91.7         | 92.1         |              |               | Reference                   |
|       |            | T         | 8.3          | 7.9          | 0.013        | 0.8432        | 1.05 (0.47, 2.31)           |
|       |            | CC        | 84.8         | 85.2         |              |               | Reference                   |
|       |            | CT        | 14.5         | 14.3         | 0.003        | 0.8901        | 1.018 (0.549, 1.886)        |
|       |            | TT        | 0.7          | 0.5          | 0.036        | 0.2767        | 1.309 (0.081, 21.135)       |
| IL12B | rs3212227  | T         | 59.66        | 59.79        |              |               | Reference                   |
|       |            | G         | 40.34        | 40.21        | 0.019        | 0.968         |                             |
|       |            | TT        | 36.8         | 36.5         |              |               | Reference                   |
|       |            | TG        | 45.5         | 46.6         | 0.056        | 0.7572        | 0.929 (0.575, 1.502)        |
|       |            | GG        | 17.7         | 16.9         | 0.09         | 0.7892        | 1.078 (0.578, 2.012)        |
|       | rs3213094  | C         | 59.66        | 60.05        |              |               | Reference                   |
|       |            | T         | 40.34        | 39.95        | 0.003        | 0.953         | 1.013 (0.651, 1.576)        |
|       |            | CC        | 37.24        | 36.51        |              |               | Reference                   |
|       |            | CT        | 44.83        | 47.09        | 0.08         | 0.777         | 0.933 (0.578, 1.506)        |
|       |            | TT        | 17.93        | 16.4         | 0.046        | 0.83          | 1.072 (0.570, 2.015)        |
|       | rs2569254  | C         | 90           | 85.71        |              |               | Reference                   |
|       |            | T         | 10           | 14.29        | 1.634        | 0.204         | 0.641 (0.323, 1.272)        |
|       |            | CC        | 82.76        | 74.07        |              |               | Reference                   |
|       |            | CT        | <b>14.48</b> | <b>23.28</b> | <b>3.995</b> | <b>0.0446</b> | <b>0.557 (0.314, 0.989)</b> |
|       |            | TT        | 2.76         | 2.65         | 0.01         | 0.8092        | 0.933 (0.245, 3.554)        |
|       | rs1433048  | A         | 88.3         | 91           |              |               | Reference                   |
|       |            | G         | 11.7         | 9            | 0.669        | 0.415         | 0.744 (0.366, 1.514)        |
|       |            | AA        | 77.2         | 82.5         |              |               | Reference                   |
|       |            | GA        | 21.4         | 16.9         | 1.136        | 0.311         | 1.349 (0.778, 2.340)        |
|       |            | GG        | 1.4          | 0.5          | 0.693        | 0.27          | 2.786 (0.250, 31.10)        |
|       | rs730691   | T         | 49.7         | 53.4         |              |               | Reference                   |
|       |            | C         | 50.3         | 46.6         | 0.471        | 0.493         | 1.164 (0.755, 1.795)        |
|       |            | TT        | 28.3         | 25.4         |              |               | Reference                   |
|       |            | <b>TC</b> | <b>42.8</b>  | <b>57.1</b>  | <b>7.973</b> | <b>0.005</b>  | <b>0.451 (0.260, 0.784)</b> |
|       |            | CC        | 29           | 17.5         | 1.601        | 0.2128        | 0.671 (0.362, 1.245)        |
|       | rs17860508 | C         | 90.3         | 89.9         |              |               | Reference                   |
|       |            | T         | 9.7          | 10.1         | 0            | 0.999         | 0.95 (0.46, 1.98)           |
|       |            | CC        | 80.0         | 79.4         |              |               | Reference                   |
|       |            | CT        | 20.0         | 20.6         | 0            | 0.892         | 0.96 (0.56, 1.63)           |
|       |            | TT        | 0.0          | 0.0          | -            | -             | -                           |
|       | rs6887695  | G         | 59.3         | 58.2         |              |               | Reference                   |
|       |            | C         | 40.7         | 41.8         | 0.042        | 0.838         | 0.955 (0.615, 1.483)        |
|       |            | GG        | 34.5         | 31.2         |              |               | Reference                   |
|       |            | GC        | 49.7         | 53.4         | 0.492        | 0.5005        | 0.841 (0.519, 1.364)        |

|  |  |    |      |      |       |        |                      |
|--|--|----|------|------|-------|--------|----------------------|
|  |  | CC | 15.9 | 15.3 | 0.038 | 0.8611 | 0.936 (0.482, 1.819) |
|--|--|----|------|------|-------|--------|----------------------|

Data in bold type indicates significant differences ( $p < 0.05$ ) between cases and controls. The data in bold and italics indicates trends ( $P < 0.1$ ) between cases and controls. rs id - Reference SNP cluster identification; OR - Odds ratio; CI = confidence interval.

**Supplementary Table S4.** Differences in the frequency of interleukin SNPs for MK only versus controls.

| Gene                         | rs ID      | Allele / Genotype | Frequency (%) |                  | $\chi^2$ value | Corrected p value | OR (95% CI)               |
|------------------------------|------------|-------------------|---------------|------------------|----------------|-------------------|---------------------------|
|                              |            |                   | Cases (N=81)  | Controls (N=189) |                |                   |                           |
| <i>IL1<math>\beta</math></i> | rs1143643  | C                 | 70.4          | 77.2             |                |                   | Reference                 |
|                              |            | T                 | 29.6          | 22.8             | 1.44           | 0.297             | 1.43 (0.80, 2.57)         |
|                              |            | CC                | 49.4          | 58.7             |                |                   | Reference                 |
|                              |            | CT                | 42.0          | 36.5             | 1.26           | 0.276             | 1.37 (0.79, 2.36)         |
|                              |            | TT                | 8.6           | 4.8              | 1.36           | 0.139             | 2.16 (0.75, 6.18)         |
|                              | rs1143634  | G                 | 88.3          | 84.1             |                |                   | Reference                 |
|                              |            | A                 | 11.7          | 15.9             | 0.69           | 0.329             | 0.66 (0.3, 1.47)          |
|                              |            | GG                | 77.8          | 71.4             |                |                   | Reference                 |
|                              |            | GA                | 21            | 24.9             | 0.41           | 0.431             | 0.78 (0.41, 1.46)         |
|                              |            | AA                | 1.2           | 3.7              | 0.59           | 0.205             | 0.31 (0.04, 2.54)         |
|                              | rs1143627  | G                 | 58.6          | 64               |                |                   | Reference                 |
|                              |            | A                 | 41.4          | 36               | 0.36           | 0.486             | 1.22 (0.72, 2.09)         |
|                              |            | GG                | 39.5          | 38.6             |                |                   | Reference                 |
|                              |            | GA                | 38.3          | 50.8             | 0.78           | 0.318             | 0.74 (0.41, 1.32)         |
|                              |            | <b>AA</b>         | <b>22.2</b>   | <b>10.6</b>      | <b>2.8</b>     | <b>0.069</b>      | <b>2.05 (0.96, 4.39)</b>  |
|                              | rs16944    | A                 | 58            | 64               |                |                   | Reference                 |
|                              |            | G                 | 42            | 36               | 0.77           | 0.408             | 1.32 (0.77, 2.24)         |
|                              |            | AA                | 38.3          | 38.6             |                |                   | Reference                 |
|                              |            | AG                | 39.5          | 51.3             | 0.62           | 0.380             | 0.76 (0.43, 1.36)         |
|                              |            | <b>GG</b>         | <b>22.2</b>   | <b>10.1</b>      | <b>3.34</b>    | <b>0.036</b>      | <b>2.20 (1.02, 4.75)</b>  |
| <i>IL6</i>                   | rs10499563 | T                 | 81.5          | 81.5             |                |                   | Reference                 |
|                              |            | C                 | 18.5          | 18.5             | 0.03           | 1.000             | 1 (0.51, 1.95)            |
|                              |            | TT                | 67.9          | 64.6             |                |                   | Reference                 |
|                              |            | TC                | 27.2          | 33.9             | 0.6            | 0.350             | 0.76 (0.43, 1.36)         |
|                              |            | <b>CC</b>         | <b>4.9</b>    | <b>1.6</b>       | <b>2.1</b>     | <b>0.093</b>      | <b>2.95 (0.64, 13.66)</b> |
|                              | rs2069827  | G                 | 95.1          | 96.8             |                |                   | Reference                 |
|                              |            | T                 | 4.9           | 3.2              | 0.12           | 0.728             | 1.58 (0.43, 5.77)         |
|                              |            | GG                | 90.1          | 94.2             |                |                   | Reference                 |
|                              |            | GT                | 9.9           | 5.8              | 0.87           | 0.200             | 1.77 (0.69, 4.59)         |
|                              |            | TT                | 0.0           | 0                | -              | -                 | -                         |
|                              | rs1800797  | G                 | 86.4          | 85.7             |                |                   | Reference                 |
|                              |            | A                 | 13.6          | 14.3             | 0.001          | 0.872             | 0.94 (0.44, 2.01)         |
|                              |            | GG                | 75.3          | 73               |                |                   | Reference                 |
|                              |            | AG                | 21.0          | 25.4             | 0.28           | 0.521             | 0.8 (0.43, 1.50)          |
|                              |            | AA                | 3.7           | 1.6              | 0.31           | 0.213             | 2.88 (0.56, 14.73)        |
|                              | rs1800795  | G                 | 87.7          | 85.2             |                |                   | Reference                 |
|                              |            | C                 | 12.3          | 14.8             | 0.12           | 0.578             | 0.81 (0.37, 1.76)         |

|      |           |           |            |             |             |              |                          |
|------|-----------|-----------|------------|-------------|-------------|--------------|--------------------------|
|      |           | GG        | 79.0       | 72          |             |              | Reference                |
|      |           | GC        | 17.3       | 26.5        | 1.93        | 0.102        | 0.59 (0.31, 1.16)        |
|      |           | CC        | 3.7        | 1.6         | 0.24        | 0.265        | 2.13 (0.42, 10.82)       |
|      | rs2069835 | T         | 92.6       | 95.8        |             |              | Reference                |
|      |           | C         | 7.4        | 4.2         | 0.6         | 0.244        | 1.81 (0.61, 5.39)        |
|      |           | TT        | 86.4       | 91          |             |              | Reference                |
|      |           | TC        | 12.3       | 9           | 0.43        | 0.402        | 1.45 (0.63, 3.31)        |
|      |           | CC        | 1.2        | 0           | -           | -            | -                        |
|      | rs1554606 | G         | 82.7       | 82          |             |              | Reference                |
|      |           | T         | 17.3       | 18          | 0.001       | 1.000        | 0.95 (0.48, 1.89)        |
|      |           | GG        | 69.1       | 66.7        |             |              | Reference                |
|      |           | GT        | 25.9       | 30.7        | 0.28        | 0.481        | 0.82 (0.45, 1.47)        |
|      |           | TT        | 4.9        | 2.6         | 0.24        | 0.398        | 1.8 (0.47, 6.96)         |
|      | rs2069861 | C         | 100.0      | 98.4        |             |              | Reference                |
|      |           | T         | 0.0        | 1.6         | -           | -            | -                        |
|      |           | CC        | 100.0      | 97.4        |             |              | Reference                |
|      |           | CT        | 0.0        | 2.6         | -           | -            | -                        |
|      |           | TT        | 0          | 0           | -           | -            | -                        |
| IL8  | rs4073    | A         | 66.7       | 59.3        |             |              | Reference                |
|      |           | T         | 33.3       | 40.7        | 1.02        | 0.397        | 0.73 (0.42, 1.26)        |
|      |           | AA        | 40.7       | 37.6        |             |              | Reference                |
|      |           | AT        | 50.6       | 43.9        | 0.02        | 0.811        | 1.00 (0.56, 1.75)        |
|      |           | TT        | <b>8.6</b> | <b>18.5</b> | <b>2.7</b>  | <b>0.062</b> | <b>0.43 (0.17, 1.07)</b> |
|      | rs2227307 | T         | 67.9       | 64          |             |              | Reference                |
|      |           | G         | 32.1       | 36          | 0.22        | 0.584        | 0.84 (0.48, 1.46)        |
|      |           | TT        | 42.0       | 43.4        |             |              | Reference                |
|      |           | TG        | 51.9       | 41.3        | 0.63        | 0.346        | 1.3 (0.75, 2.25)         |
|      |           | <b>GG</b> | <b>6.2</b> | <b>15.3</b> | <b>2.21</b> | <b>0.086</b> | <b>0.42 (0.15, 1.17)</b> |
|      | rs2227306 | C         | 79.0       | 77.8        |             |              | Reference                |
|      |           | T         | 21.0       | 22.2        | 0.004       | 0.862        | 0.93 (0.49, 1.76)        |
|      |           | CC        | 60.5       | 63          |             |              | Reference                |
|      |           | CT        | 35.8       | 29.6        | 0.44        | 0.429        | 1.26 (0.72, 2.2)         |
|      |           | TT        | 3.7        | 7.4         | 0.523       | 0.339        | 0.52 (0.14, 1.89)        |
|      | rs2227543 | C         | 70.4       | 66.1        |             |              | Reference                |
|      |           | T         | 29.6       | 33.9        | 0.02        | 0.541        | 0.92 (0.52, 1.63)        |
|      |           | CC        | 46.9       | 46          |             |              | Reference                |
|      |           | CT        | 46.9       | 40.2        | 3.3         | 0.117        | 1.81 (1, 3.29)           |
|      |           | TT        | 6.2        | 13.8        | 0.18        | 0.6214       | 0.7 (0.24, 2.01)         |
| IL10 | rs3024498 | T         | 90.1       | 91          |             |              | Reference                |
|      |           | C         | 9.9        | 9           | 0           | 0.831        | 1.11 (0.46, 2.68)        |
|      |           | TT        | 82.7       | 82.5        |             |              | Reference                |
|      |           | TC        | 14.8       | 16.9        | 0.04        | 0.697        | 0.87 (0.42, 1.8)         |
|      |           | CC        | 2.5        | 0.5         | 0.543       | 0.102        | 1.16 (0.10, 13.06)       |

|  |           |    |      |      |       |       |                    |
|--|-----------|----|------|------|-------|-------|--------------------|
|  | rs1554286 | G  | 54.3 | 58.2 |       |       | Reference          |
|  |           | A  | 45.7 | 41.8 | 0.21  | 0.589 | 1.17 (0.69, 1.98)  |
|  |           | GG | 32.1 | 35.4 |       |       | Reference          |
|  |           | GA | 43.2 | 45   | 0     | 0.832 | 1.06 (0.58, 1.93)  |
|  |           | AA | 24.7 | 19.6 | 0.54  | 0.357 | 1.39 (0.69, 2.83)  |
|  | rs1518111 | C  | 49.4 | 56.1 |       |       | Reference          |
|  |           | T  | 50.6 | 43.9 | 0.77  | 0.270 | 1.31 (0.78, 2.21)  |
|  |           | CC | 29.6 | 31.7 |       |       | Reference          |
|  |           | CT | 38.3 | 48.1 | 0.12  | 0.606 | 0.85 (0.46, 1.59)  |
|  |           | TT | 32.1 | 20.1 | 1.85  | 0.115 | 1.71 (0.86, 3.4)   |
|  | rs1518110 | C  | 49.4 | 56.1 |       |       | Reference          |
|  |           | A  | 50.6 | 43.9 | 0.77  | 0.284 | 1.31 (0.78, 2.21)  |
|  |           | CC | 27.2 | 31.2 |       |       | Reference          |
|  |           | CA | 43.2 | 49.2 | 0.02  | 0.999 | 1.01 (0.54, 1.89)  |
|  |           | AA | 29.6 | 19.6 | 1.83  | 0.120 | 1.74 (0.86, 3.54)  |
|  | rs3021094 | T  | 87.7 | 90.5 |       |       | Reference          |
|  |           | G  | 12.3 | 9.5  | 0.23  | 0.419 | 1.34 (0.59, 3.04)  |
|  |           | TT | 75.3 | 82   |       |       | Reference          |
|  |           | TG | 23.5 | 17.5 | 1.01  | 0.231 | 1.46 (0.77, 2.77)  |
|  |           | GG | 1.2  | 0.5  | 0.012 | 0.360 | 2.54 (0.16, 41.27) |
|  | rs1800872 | G  | 46.9 | 54.5 |       |       | Reference          |
|  |           | T  | 53.1 | 45.5 | 1.02  | 0.294 | 1.36 (0.8, 2.28)   |
|  |           | GG | 25.9 | 30.2 |       |       | Reference          |
|  |           | GT | 42.0 | 48.1 | 0.01  | 0.999 | 1.01 (0.54, 1.92)  |
|  |           | TT | 32.1 | 21.7 | 1.81  | 0.116 | 1.72 (0.85, 3.47)  |
|  | rs1800896 | T  | 76.5 | 78.3 |       |       | Reference          |
|  |           | C  | 23.5 | 21.7 | 0.03  | 0.761 | 1.11 (0.6, 2.06)   |
|  |           | TT | 59.3 | 60.8 |       |       | Reference          |
|  |           | TC | 34.6 | 34.9 | 0.01  | 0.940 | 1.02 (0.58, 1.77)  |
|  |           | CC | 6.2  | 4.2  | 0.135 | 0.467 | 1.5 (0.47, 4.81)   |
|  | rs1800893 | C  | 75.3 | 78.3 |       |       | Reference          |
|  |           | T  | 24.7 | 21.7 | 0.15  | 0.640 | 1.18 (0.64, 2.18)  |
|  |           | CC | 56.8 | 60.3 |       |       | Reference          |
|  |           | CT | 37.0 | 35.4 | 0.05  | 0.736 | 1.11 (0.64, 1.92)  |
|  |           | TT | 6.2  | 4.2  | 0.178 | 0.446 | 1.55 (0.48, 4.98)  |
|  | rs6693899 | G  | 80.2 | 83.6 |       |       | Reference          |
|  |           | T  | 19.8 | 16.4 | 0.24  | 0.620 | 1.26 (0.64, 2.45)  |
|  |           | GG | 67.9 | 71.4 |       |       | Reference          |
|  |           | GT | 24.7 | 24.9 | 0     | 0.867 | 1.05 (0.57, 1.92)  |
|  |           | TT | 7.4  | 3.7  | 0.993 | 0.177 | 2.10 (0.68, 6.54)  |
|  | rs6703630 | C  | 92.6 | 92.1 |       |       | Reference          |
|  |           | T  | 7.4  | 7.9  | 0.01  | 1.000 | 0.93 (0.35, 2.48)  |
|  |           | CC | 86.4 | 85.2 |       |       | Reference          |

|              |            |           |             |             |             |              |                          |
|--------------|------------|-----------|-------------|-------------|-------------|--------------|--------------------------|
|              |            | CT        | 12.3        | 14.3        | 0.04        | 0.678        | 0.85 (0.39, 1.86)        |
|              |            | TT        | 1.2         | 0.5         | 0.029       | 0.866        | 2.3 (0.14, 37.3)         |
| <i>IL12B</i> | rs3212227  | T         | 56.8        | 59.8        |             |              | Reference                |
|              |            | G         | 43.2        | 40.2        | 0.1         | 0.486        | 1.13 (0.67, 1.92)        |
|              |            | TT        | 35.8        | 36.5        |             |              | Reference                |
|              |            | TG        | 40.7        | 46.6        | 0.05        | 0.731        | 0.89 (0.49, 1.61)        |
|              |            | GG        | 23.5        | 16.9        | 0.59        | 0.352        | 1.41 (0.69, 2.89)        |
|              | rs3213094  | C         | 56.8        | 60.1        |             |              | Reference                |
|              |            | T         | 43.2        | 40.0        | 0.1         | 0.686        | 1.13 (0.67, 1.92)        |
|              |            | CC        | 35.8        | 36.5        |             |              | Reference                |
|              |            | CT        | 42.0        | 47.1        | 0.03        | 0.768        | 0.91 (0.51, 1.63)        |
|              |            | TT        | 22.2        | 16.4        | 0.47        | 0.387        | 1.38 (0.67, 2.85)        |
|              | rs2569254  | C         | 91.4        | 85.7        |             |              | Reference                |
|              |            | T         | 8.6         | 14.3        | 1.17        | 0.189        | 0.57 (0.24, 1.36)        |
|              |            | CC        | 85.2        | 74.1        |             |              | Reference                |
|              |            | CT        | <b>12.3</b> | <b>23.3</b> | <b>3.63</b> | <b>0.045</b> | <b>0.46 (0.22, 0.97)</b> |
|              |            | TT        | 2.5         | 2.7         | 0.027       | 0.600        | 0.81 (0.15, 4.29)        |
|              | rs1433048  | A         | 87.7        | 91.0        |             |              | Reference                |
|              |            | G         | 12.3        | 9.0         | 0.38        | 0.513        | 1.43 (0.62, 3.26)        |
|              |            | AA        | 77.8        | 82.5        |             |              | Reference                |
|              |            | GA        | 19.8        | 16.9        | 0.21        | 0.523        | 1.24 (0.64, 2.41)        |
|              |            | GG        | 2.5         | 0.5         | 0.631       | 0.205        | 4.95 (0.44, 55.6)        |
|              | rs730691   | T         | 53.1        | 53.4        |             |              | Reference                |
|              |            | C         | 46.9        | 46.6        | 0.01        | 0.999        | 1.01 (0.6, 1.71)         |
|              |            | TT        | 32.1        | 25.4        |             |              | Reference                |
|              |            | <b>TC</b> | <b>40.7</b> | <b>57.1</b> | <b>2.79</b> | <b>0.007</b> | <b>0.56 (0.31, 1.05)</b> |
|              |            | CC        | 27.2        | 17.5        | 0.15        | 0.137        | 1.23 (0.6, 2.53)         |
|              | rs17860508 | C         | 90.1        | 89.9        |             |              | Reference                |
|              |            | T         | 9.9         | 10.1        | 0.02        | 0.999        | 1.03 (0.43, 2.46)        |
|              |            | CC        | 80.2        | 79.4        |             |              | Reference                |
|              |            | CT        | 19.8        | 20.6        | 0           | 1.000        | 0.95 (0.49, 1.82)        |
|              |            | TT        | 0.0         | 0.0         | -           | -            | -                        |
|              | rs6887695  | G         | 60.5        | 58.2        |             |              | Reference                |
|              |            | C         | 39.5        | 41.8        | 0.05        | 0.892        | 0.91 (0.53, 1.55)        |
|              |            | GG        | 35.8        | 31.2        |             |              | Reference                |
|              |            | GC        | 48.1        | 53.4        | 0.45        | 0.406        | 0.79 (0.44, 1.4)         |
|              |            | CC        | 16.0        | 15.3        | 0           | 0.8172       | 0.91 (0.41, 2.01)        |

Data in bold type indicates significant differences ( $p < 0.05$ ) between cases and controls. Data in bold and italics indicates a trend ( $p < 0.1$ ) for a difference between cases and controls. rs id - Reference SNP cluster identification; OR - Odds ratio; CI = confidence interval

**Supplementary Table S5.** Differences in the frequency of interleukin SNPs for SK only versus controls.

| Gene                         | rs ID      | Allele / Genotype | Frequency (%) |                  | X <sup>2</sup> value | Corrected p value | OR (95% CI)        |
|------------------------------|------------|-------------------|---------------|------------------|----------------------|-------------------|--------------------|
|                              |            |                   | Cases (N=64)  | Controls (N=189) |                      |                   |                    |
| <i>IL1<math>\beta</math></i> | rs1143643  | C                 | 73.4          | 77.2             |                      |                   | Reference          |
|                              |            | T                 | 26.6          | 22.8             | 0.04                 | 0.583             | 1.12 (0.59, 2.14)  |
|                              |            | CC                | 54.7          | 58.7             |                      |                   | Reference          |
|                              |            | CT                | 35.9          | 36.5             | 0                    | 0.827             | 1.06 (0.58, 1.94)  |
|                              |            | TT                | 9.4           | 4.8              | 1.09                 | 0.126             | 2.11 (0.70, 6.36)  |
|                              | rs1143634  | G                 | 84.4          | 84.1             |                      |                   | Reference          |
|                              |            | A                 | 15.6          | 15.9             | 0.02                 | 0.829             | 0.98 (0.45, 2.14)  |
|                              |            | GG                | 71.9          | 71.4             |                      |                   | Reference          |
|                              |            | GA                | 25.0          | 24.9             | 0.03                 | 0.960             | 1 (0.52, 1.93)     |
|                              |            | AA                | 3.1           | 3.7              | 0.016                | 0.749             | 0.84 (0.17, 4.18)  |
|                              | rs1143627  | G                 | 59.4          | 64               |                      |                   | Reference          |
|                              |            | A                 | 40.6          | 36               | 0.27                 | 0.540             | 1.22 (0.68, 2.18)  |
|                              |            | GG                | 35.9          | 38.6             |                      |                   | Reference          |
|                              |            | GA                | 46.9          | 50.8             | 0.02                 | 0.975             | 0.99 (0.53, 1.85)  |
|                              |            | AA                | 17.2          | 10.6             | 1.05                 | 0.216             | 1.75 (0.73, 4.18)  |
|                              | rs16944    | A                 | 59.4          | 64               |                      |                   | Reference          |
|                              |            | G                 | 40.6          | 36               | 0.27                 | 0.518             | 1.22 (0.68, 2.18)  |
|                              |            | AA                | 35.9          | 38.6             |                      |                   | Reference          |
|                              |            | AG                | 46.9          | 51.3             | 0.01                 | 0.962             | 0.98 (0.53, 1.83)  |
|                              |            | GG                | 17.2          | 10.1             | 1.28                 | 0.1628            | 1.84 (0.76, 4.42)  |
| <i>IL6</i>                   | rs10499563 | T                 | 79.7          | 81.5             |                      |                   | Reference          |
|                              |            | C                 | 20.3          | 18.5             | 0.02                 | 0.569             | 1.12 (0.55, 2.28)  |
|                              |            | TT                | 62.5          | 64.6             |                      |                   | Reference          |
|                              |            | TC                | 32.8          | 33.9             | 0.02                 | 0.983             | 1 (0.55, 1.84)     |
|                              |            | CC                | 4.7           | 1.6              | 0.84                 | 0.112             | 3.05 (0.59, 15.72) |
|                              | rs2069827  | G                 | 98.4          | 96.8             |                      |                   | Reference          |
|                              |            | T                 | 1.6           | 3.2              | 0.05                 | 0.682             | 0.48 (0.06, 4.1)   |
|                              |            | GG                | 96.9          | 94.2             |                      |                   | Reference          |
|                              |            | GT                | 3.1           | 5.8              | 0.27                 | 0.523             | 0.52 (0.11, 2.42)  |
|                              |            | TT                | 0.0           | 0                | -                    | -                 | -                  |
|                              | rs1800797  | G                 | 89.1          | 85.7             |                      |                   | Reference          |
|                              |            | A                 | 10.9          | 14.3             | 0.22                 | 0.538             | 0.74 (0.30, 1.78)  |
|                              |            | GG                | 79.7          | 73               |                      |                   | Reference          |
|                              |            | AG                | 17.2          | 25.4             | 1.25                 | 0.213             | 0.62 (0.3, 1.29)   |
|                              |            | AA                | 3.1           | 1.6              | 0.019                | 0.324             | 1.80 (0.29, 11.11) |
|                              | rs1800795  | G                 | 89.1          | 85.2             |                      |                   | Reference          |
|                              |            | C                 | 10.9          | 14.8             | 0.32                 | 0.419             | 0.71 (0.29, 1.71)  |



|      |           |           |            |            |             |              |                         |
|------|-----------|-----------|------------|------------|-------------|--------------|-------------------------|
|      |           | GG        | 81.3       | 72         |             |              | Reference               |
|      |           | GC        | 15.6       | 26.5       | 2.37        | 0.113        | 0.52 (0.25, 1.11)       |
|      |           | CC        | 3.1        | 1.6        | 0.01        | 0.340        | 1.74 (0.28, 10.74)      |
|      | rs2069835 | T         | 96.9       | 95.8       |             |              | Reference               |
|      |           | C         | 3.1        | 4.2        | 0           | 1.000        | 0.73 (0.15, 3.53)       |
|      |           | TT        | 93.8       | 91         |             |              | Reference               |
|      |           | TC        | 4.7        | 9          | 0.65        | 0.300        | 0.51 (0.14, 1.79)       |
|      |           | CC        | 1.6        | 0          | -           | -            | -                       |
|      | rs1554606 | G         | 82.8       | 82         |             |              | Reference               |
|      |           | T         | 17.2       | 18         | 0           | 1.000        | 0.95 (0.45, 2.0)        |
|      |           | GG        | 71.9       | 66.7       |             |              | Reference               |
|      |           | GT        | 20.3       | 30.7       | 1.51        | 0.164        | 0.61 (0.31, 1.22)       |
|      |           | <b>TT</b> | <b>7.8</b> | <b>2.6</b> | <b>1.51</b> | <b>0.090</b> | <b>2.74 (0.76, 9.9)</b> |
|      | rs2069861 | C         | 96.9       | 98.4       |             |              | Reference               |
|      |           | T         | 3.1        | 1.6        | 0.06        | 0.603        | 2.00 (0.33, 12.25)      |
|      |           | CC        | 93.8       | 97.4       |             |              | Reference               |
|      |           | CT        | 6.3        | 2.6        | 0.912       | 0.236        | 2.45 (0.64, 9.43)       |
|      |           | TT        | 0          | 0          | -           | -            | -                       |
| IL8  | rs4073    | A         | 64.1       | 59.3       |             |              | Reference               |
|      |           | T         | 35.9       | 40.7       | 0.28        | 0.565        | 0.82 (0.45, 1.47)       |
|      |           | AA        | 37.5       | 37.6       |             |              | Reference               |
|      |           | AT        | 53.1       | 43.9       | 0.21        | 0.532        | 1.21 (0.66, 2.23)       |
|      |           | TT        | 9.4        | 18.5       | 1.31        | 0.164        | 0.51 (0.19, 1.35)       |
|      | rs2227307 | T         | 65.6       | 64         |             |              | Reference               |
|      |           | G         | 34.4       | 36         | 0.01        | 0.767        | 0.93 (0.51, 1.69)       |
|      |           | TT        | 40.6       | 43.4       |             |              | Reference               |
|      |           | TG        | 50.0       | 41.3       | 0.47        | 0.448        | 1.29 (0.71, 2.37)       |
|      |           | GG        | 9.4        | 15.3       | 0.39        | 0.421        | 0.65 (0.24, 1.75)       |
|      | rs2227306 | C         | 81.3       | 77.8       |             |              | Reference               |
|      |           | T         | 18.8       | 22.2       | 0.17        | 0.621        | 0.81 (0.4, 1.65)        |
|      |           | CC        | 64.1       | 63         |             |              | Reference               |
|      |           | CT        | 32.8       | 29.6       | 0.01        | 0.764        | 1.09 (0.59, 2.01)       |
|      |           | TT        | 3.1        | 7.4        | 0.739       | 0.257        | 0.42 (0.09, 1.90)       |
|      | rs2227543 | C         | 70.3       | 66.1       |             |              | Reference               |
|      |           | T         | 29.7       | 33.9       | 0.21        | 0.639        | 0.83 (0.45, 1.53)       |
|      |           | CC        | 46.9       | 46         |             |              | Reference               |
|      |           | CT        | 45.3       | 40.2       | 0.03        | 0.712        | 1.11 (0.61, 2.01)       |
|      |           | TT        | 7.81       | 13.8       | 0.76        | 0.252        | 0.56 (0.2, 1.58)        |
| IL10 | rs3024498 | T         | 90.6       | 91         |             |              | Reference               |
|      |           | C         | 9.4        | 9          | 0.03        | 0.999        | 1.05 (0.39, 2.78)       |
|      |           | TT        | 82.8       | 82.5       |             |              | Reference               |
|      |           | TC        | 15.6       | 16.9       | 0.06        | 0.794        | 0.84 (0.39, 1.82)       |
|      |           | CC        | 1.6        | 0.5        | 0           | 0.192        | 2.69 (0.17, 43.71)      |

|  |           |    |      |      |       |       |                    |
|--|-----------|----|------|------|-------|-------|--------------------|
|  | rs1554286 | G  | 59.4 | 58.2 |       |       | Reference          |
|  |           | A  | 40.6 | 41.8 | 0     | 0.867 | 0.95 (0.53, 1.7)   |
|  |           | GG | 37.5 | 35.4 |       |       | Reference          |
|  |           | GA | 43.8 | 45   | 0.01  | 0.790 | 0.92 (0.49, 1.73)  |
|  |           | AA | 18.8 | 19.6 | 0     | 0.804 | 0.91 (0.41, 2.02)  |
|  | rs1518111 | C  | 57.8 | 56.1 |       |       | Reference          |
|  |           | T  | 42.2 | 43.9 | 0.01  | 0.871 | 0.93 (0.53, 1.65)  |
|  |           | CC | 34.4 | 31.7 |       |       | Reference          |
|  |           | CT | 45.3 | 48.1 | 0.07  | 0.668 | 0.87 (0.46, 1.65)  |
|  |           | TT | 20.3 | 20.1 | 0     | 0.867 | 0.93 (0.42, 2.07)  |
|  | rs1518110 | C  | 57.8 | 56.1 |       |       | Reference          |
|  |           | A  | 42.2 | 43.9 | 0.01  | 0.883 | 0.93 (0.53, 1.65)  |
|  |           | CC | 34.4 | 31.2 |       |       | Reference          |
|  |           | CA | 45.3 | 49.2 | 0.14  | 0.746 | 0.84 (0.44, 1.59)  |
|  |           | AA | 20.3 | 19.6 | 0     | 0.897 | 0.94 (0.42, 2.1)   |
|  | rs3021094 | T  | 92.2 | 90.5 |       |       | Reference          |
|  |           | G  | 7.8  | 9.5  | 0.03  | 0.786 | 0.81 (0.29, 2.26)  |
|  |           | TT | 85.9 | 82   |       |       | Reference          |
|  |           | TG | 12.5 | 17.5 | 0.5   | 0.426 | 0.68 (0.3, 1.57)   |
|  |           | GG | 1.6  | 0.5  | 0.002 | 0.340 | 2.82 (0.17, 45.83) |
|  | rs1800872 | G  | 54.7 | 54.5 |       |       | Reference          |
|  |           | T  | 45.3 | 45.5 | 0.01  | 0.896 | 0.99 (0.56, 1.75)  |
|  |           | GG | 29.7 | 30.2 |       |       | Reference          |
|  |           | GT | 50.0 | 48.1 | 0     | 0.783 | 1.06 (0.55, 2.04)  |
|  |           | TT | 20.3 | 21.7 | 0.01  | 0.909 | 0.95 (0.42, 2.14)  |
|  | rs1800896 | T  | 78.1 | 78.3 |       |       | Reference          |
|  |           | C  | 21.9 | 21.7 | 0.02  | 1.000 | 1.01 (0.51, 2.01)  |
|  |           | TT | 60.9 | 60.8 |       |       | Reference          |
|  |           | TC | 34.4 | 34.9 | 0.01  | 0.977 | 0.98 (0.54, 1.8)   |
|  |           | CC | 4.7  | 4.2  | 0.046 | 0.838 | 1.11 (0.28, 4.38)  |
|  | rs1800893 | C  | 76.6 | 78.3 |       |       | Reference          |
|  |           | T  | 23.4 | 21.7 | 0.01  | 0.760 | 1.11 (0.56, 2.17)  |
|  |           | CC | 57.8 | 60.3 |       |       | Reference          |
|  |           | CT | 35.9 | 35.4 | 0     | 0.834 | 1.06 (0.58, 1.93)  |
|  |           | TT | 6.3  | 4.2  | 0.111 | 0.523 | 1.54 (0.44, 5.41)  |
|  | rs6693899 | G  | 76.6 | 83.6 |       |       | Reference          |
|  |           | T  | 23.4 | 16.4 | 1.15  | 0.261 | 1.56 (0.78, 3.13)  |
|  |           | GG | 59.4 | 71.4 |       |       | Reference          |
|  |           | GT | 34.4 | 24.9 | 2.1   | 0.101 | 1.66 (0.89, 3.1)   |
|  |           | TT | 6.3  | 3.7  | 0.537 | 0.272 | 2.03 (0.56, 7.30)  |
|  | rs6703630 | C  | 92.2 | 92.1 |       |       | Reference          |
|  |           | T  | 7.8  | 7.9  | 0.06  | 0.616 | 0.98 (0.34, 2.82)  |
|  |           | CC | 82.8 | 85.2 |       |       | Reference          |

|              |            |    |       |      |       |       |                   |
|--------------|------------|----|-------|------|-------|-------|-------------------|
|              |            | CT | 17.2  | 14.3 | 0.12  | 0.610 | 1.24 (0.58, 2.66) |
|              |            | TT | 0     | 0.5  | -     | -     | -                 |
| <i>IL12B</i> | rs3212227  | T  | 64.1  | 59.8 |       |       | Reference         |
|              |            | G  | 35.9  | 40.2 | 0.21  | 0.557 | 0.83 (0.46, 1.50) |
|              |            | TT | 39.1  | 36.5 |       |       | Reference         |
|              |            | TG | 48.4  | 46.6 | 0     | 1.000 | 0.97 (0.53, 1.8)  |
|              |            | GG | 12.5  | 16.9 | 0.35  | 0.513 | 0.69 (0.28, 1.7)  |
|              | rs3213094  | C  | 64.1  | 60.1 |       |       | Reference         |
|              |            | T  | 35.9  | 40.0 | 0.21  | 0.557 | 0.83 (0.46, 1.50) |
|              |            | CC | 39.1  | 36.5 |       |       | Reference         |
|              |            | CT | 48.4  | 47.1 | 0     | 1.000 | 0.96 (0.52, 1.78) |
|              |            | TT | 12.5  | 16.4 | 0.27  | 0.515 | 0.71 (0.29, 1.76) |
|              | rs2569254  | C  | 89.1  | 85.7 |       |       | Reference         |
|              |            | T  | 10.9  | 14.3 | 0.22  | 0.535 | 0.74 (0.3, 1.78)  |
|              |            | CC | 79.7  | 74.1 |       |       | Reference         |
|              |            | CT | 17.2  | 23.3 | 0.69  | 0.379 | 0.69 (0.33, 1.43) |
|              |            | TT | 3.1   | 2.7  | 0.105 | 1.000 | 1.1 (0.21, 5.84)  |
|              | rs1433048  | A  | 87.5  | 91.0 |       |       | Reference         |
|              |            | G  | 12.5  | 9.0  | 0.32  | 0.467 | 1.45 (0.59, 3.53) |
|              |            | AA | 76.6  | 82.5 |       |       | Reference         |
|              |            | GA | 21.9  | 16.9 | 0.54  | 0.451 | 1.39 (0.69, 2.82) |
|              |            | GG | 1.6   | 0.5  | 0     | 0.425 | 3.18 (0.2, 51.85) |
|              | rs730691   | T  | 48.4  | 53.4 |       |       | Reference         |
|              |            | C  | 51.6  | 46.6 | 0.3   | 0.562 | 1.22 (0.69, 2.16) |
|              |            | TT | 25.0  | 25.4 |       |       | Reference         |
|              |            | TC | 45.3  | 57.1 | 0.18  | 0.587 | 0.81 (0.40, 1.62) |
|              |            | CC | 29.7  | 17.5 | 1.31  | 0.223 | 1.73 (0.78, 3.84) |
|              | rs17860508 | C  | 90.6  | 89.9 |       |       | Reference         |
|              |            | T  | 9.4   | 10.1 | 0.01  | 1.000 | 0.93 (0.35, 2.43) |
|              |            | CC | 79.7  | 79.4 |       |       | Reference         |
|              |            | CT | 20.3  | 20.6 | 0.02  | 1.000 | 0.98 (0.49, 1.98) |
|              |            | TT | 0.0   | 0.0  | -     | -     | -                 |
|              | rs6887695  | G  | 59.4  | 58.2 |       |       | Reference         |
|              |            | C  | 40.6  | 41.8 | 0     | 0.884 | 0.95 (0.54, 1.7)  |
|              |            | GG | 32.8  | 31.2 |       |       | Reference         |
|              |            | GC | 51.6  | 53.4 | 0.01  | 0.871 | 0.92 (0.49, 1.73) |
|              |            | CC | 15.63 | 15.3 | 0.02  | 1     | 0.97 (0.40, 2.32) |

Data in bold type indicates significant differences ( $p < 0.05$ ) between cases and controls. Data in bold and italics indicates a trend ( $p < 0.1$ ) for a difference between cases and controls. rs id - Reference SNP cluster identification; OR - Odds ratio; CI = confidence interval

**Supplementary Table S6.** Differences in the frequency of interleukin SNPs for MK only versus SK only.

| Gene        | rs ID      | Allele / Genotype | Frequency (%)   |                 | X <sup>2</sup> value | Corrected p value | OR (95% CI)        |
|-------------|------------|-------------------|-----------------|-----------------|----------------------|-------------------|--------------------|
|             |            |                   | MK Cases (N=81) | SK Cases (N=64) |                      |                   |                    |
| <i>IL1b</i> | rs1143643  | C                 | 70.4            | 73.4            |                      |                   | Reference          |
|             |            | T                 | 29.6            | 26.6            | 0.05                 | 0.714             | 1.16 (0.56, 2.42)  |
|             |            | CC                | 49.4            | 54.7            |                      |                   | Reference          |
|             |            | CT                | 42.0            | 35.9            | 0.3                  | 0.484             | 1.29 (0.64, 2.6)   |
|             |            | TT                | 8.6             | 9.4             | 0.07                 | 1.000             | 1.02 (0.31, 3.33)  |
|             | rs1143634  | G                 | 88.3            | 84.4            |                      |                   | Reference          |
|             |            | A                 | 11.7            | 15.6            | 0.3                  | 0.464             | 0.68 (0.26, 1.78)  |
|             |            | GG                | 77.8            | 71.9            |                      |                   | Reference          |
|             |            | GA                | 21.0            | 25.0            | 0.19                 | 0.552             | 0.78 (0.36, 1.7)   |
|             |            | AA                | 1.2             | 3.1             | 0.064                | 0.799             | 0.37 (0.03, 4.15)  |
|             | rs1143627  | G                 | 58.6            | 59.4            |                      |                   | Reference          |
|             |            | A                 | 41.4            | 40.6            | 0                    | 1.000             | 1.06 (0.54, 2.06)  |
|             |            | GG                | 39.5            | 35.9            |                      |                   | Reference          |
|             |            | GA                | 38.3            | 46.9            | 0.37                 | 0.459             | 0.74 (0.36, 1.55)  |
|             |            | AA                | 22.2            | 17.2            | 0.01                 | 0.817             | 1.18 (0.47, 2.96)  |
|             | rs16944    | A                 | 58.0            | 59.4            |                      |                   | Reference          |
|             |            | G                 | 42.0            | 40.6            | 0                    | 1.000             | 1.06 (0.54, 2.06)  |
|             |            | AA                | 38.3            | 35.9            |                      |                   | Reference          |
|             |            | AG                | 39.5            | 46.9            | 0.19                 | 0.578             | 0.79 (0.38, 1.65)  |
|             |            | GG                | 22.2            | 17.2            | 0.03                 | 0.815             | 1.21 (0.48, 3.06)  |
| <i>IL6</i>  | rs10499563 | T                 | 81.5            | 79.7            |                      |                   | Reference          |
|             |            | C                 | 18.5            | 20.3            | 0                    | 0.834             | 0.89 (0.39, 2.04)  |
|             |            | TT                | 67.9            | 62.5            |                      |                   | Reference          |
|             |            | TC                | 27.2            | 32.8            | 0.310                | 0.579             | 0.76 (0.37, 1.57)  |
|             |            | CC                | 4.9             | 4.7             | 0.127                | 0.721             | 0.55 (0.12, 2.57)  |
|             | rs2069827  | G                 | 95.1            | 98.4            |                      |                   | Reference          |
|             |            | T                 | 4.9             | 1.6             | 0.419                | 0.517             | 3.27 (0.36, 30.03) |
|             |            | GG                | 90.1            | 96.9            |                      |                   | Reference          |
|             |            | GT                | 9.9             | 3.1             | 1.595                | 0.206             | 3.4 (0.7, 16.6)    |
|             |            | TT                | 0.0             | 0.0             | -                    | -                 | -                  |
|             | rs1800797  | G                 | 86.4            | 89.1            |                      |                   | Reference          |
|             |            | A                 | 13.6            | 10.9            | 0.05                 | 0.800             | 1.28 (0.47, 3.51)  |
|             |            | GG                | 75.3            | 79.7            |                      |                   | Reference          |
|             |            | AG                | 21.0            | 17.2            | 0.150                | 0.672             | 1.29 (0.56, 3.01)  |
|             |            | AA                | 3.7             | 3.1             | 0.046                | 0.829             | 1.25 (0.20, 7.8)   |
|             | rs1800795  | G                 | 87.7            | 89.1            |                      |                   | Reference          |
|             |            | C                 | 12.3            | 10.9            | 0                    | 1.000             | 1.15 (0.41, 3.20)  |
|             |            | GG                | 79.0            | 81.3            |                      |                   | Reference          |

|      |           |    |       |      |       |       |                    |
|------|-----------|----|-------|------|-------|-------|--------------------|
|      |           | GC | 17.3  | 15.6 | 0.000 | 0.824 | 1.14 (0.47, 2.77)  |
|      |           | CC | 3.7   | 3.1  | 0.06  | 0.805 | 1.22 (0.2, 7.57)   |
|      | rs2069835 | T  | 92.6  | 96.9 |       |       | Reference          |
|      |           | C  | 7.4   | 3.1  | 0.57  | 0.450 | 2.48 (0.48, 12.73) |
|      |           | TT | 86.4  | 93.8 |       |       | Reference          |
|      |           | TC | 12.3  | 4.7  | 1.700 | 0.146 | 2.86 (0.75, 10.86) |
|      |           | CC | 1.2   | 1.6  | 0.367 | 0.544 | 0.86 (0.05, 14.00) |
|      |           |    |       |      |       |       |                    |
|      | rs1554606 | G  | 82.7  | 82.8 |       |       | Reference          |
|      |           | T  | 17.3  | 17.2 | 0.04  | 1.000 | 1.01 (0.42, 2.4)   |
|      |           | GG | 69.1  | 71.9 |       |       | Reference          |
|      |           | GT | 25.9  | 20.3 | 0.25  | 0.551 | 1.33 (0.6, 2.94)   |
|      |           | TT | 4.9   | 7.8  | 0.064 | 0.799 | 0.66 (0.17, 2.59)  |
|      | rs2069861 | C  | 100.0 | 96.9 |       |       | Reference          |
|      |           | T  | 0.0   | 3.1  | -     | -     | -                  |
|      |           | CC | 100.0 | 93.8 |       |       | Reference          |
|      |           | CT | 0.0   | 6.3  | -     | -     | -                  |
|      |           | TT | 0.0   | 0.0  | -     | -     | -                  |
| IL8  | rs4073    | A  | 66.7  | 64.1 |       |       | Reference          |
|      |           | T  | 33.3  | 35.9 | 0.02  | 0.860 | 0.89 (0.45, 1.78)  |
|      |           | AA | 40.7  | 37.5 |       |       | Reference          |
|      |           | AT | 50.6  | 53.1 | 0.04  | 0.726 | 0.88 (0.44, 1.76)  |
|      |           | TT | 8.6   | 9.4  | 0     | 1.000 | 0.85 (0.25, 2.85)  |
|      | rs2227307 | T  | 67.9  | 65.6 |       |       | Reference          |
|      |           | G  | 32.1  | 34.4 | 0.01  | 0.859 | 0.90 (0.45, 1.81)  |
|      |           | TT | 42.0  | 40.6 |       |       | Reference          |
|      |           | TG | 51.9  | 50.0 | 0.03  | 1.000 | 1.00 (0.51, 2.00)  |
|      |           | GG | 6.2   | 9.4  | 0.127 | 0.720 | 0.64 (0.18, 2.32)  |
|      | rs2227306 | C  | 79.0  | 81.3 |       |       | Reference          |
|      |           | T  | 21.0  | 18.8 | 0.02  | 0.835 | 1.15 (0.51, 2.63)  |
|      |           | CC | 60.5  | 64.1 |       |       | Reference          |
|      |           | CT | 35.8  | 32.8 | 0.05  | 0.725 | 1.16 (0.58, 2.32)  |
|      |           | TT | 3.7   | 3.1  | 0.047 | 0.826 | 1.26 (0.2, 7.88)   |
|      | rs2227543 | C  | 70.4  | 70.3 |       |       | Reference          |
|      |           | T  | 29.6  | 29.7 | 0.03  | 1.000 | 1.00 (0.49, 2.04)  |
|      |           | CC | 46.9  | 46.9 |       |       | Reference          |
|      |           | CT | 46.9  | 45.3 | 0.01  | 1.000 | 1.04 (0.52, 2.04)  |
|      |           | TT | 6.2   | 7.8  | 0     | 0.993 | 0.79 (0.21, 2.98)  |
| IL10 | rs3024498 | T  | 90.1  | 90.6 |       |       | Reference          |
|      |           | C  | 9.9   | 9.4  | 0.03  | 1.000 | 1.06 (0.35, 3.23)  |
|      |           | TT | 82.7  | 82.8 |       |       | Reference          |
|      |           | TC | 14.8  | 15.6 | 0.01  | 0.976 | 0.95 (0.38, 2.37)  |
|      |           | CC | 2.5   | 1.6  | 0.046 | 0.829 | 1.58 (0.14, 17.92) |

|  |           |    |      |      |       |       |                    |
|--|-----------|----|------|------|-------|-------|--------------------|
|  | rs1554286 | G  | 54.3 | 59.4 |       |       | Reference          |
|  |           | A  | 45.7 | 40.6 | 0.19  | 0.613 | 1.23 (0.63, 2.39)  |
|  |           | GG | 32.1 | 37.5 |       |       | Reference          |
|  |           | GA | 43.2 | 43.8 | 0.03  | 0.849 | 1.15 (0.55, 2.43)  |
|  |           | AA | 24.7 | 18.8 | 0.5   | 0.372 | 1.54 (0.62, 3.81)  |
|  | rs1518111 | C  | 49.4 | 57.8 |       |       | Reference          |
|  |           | T  | 50.6 | 42.2 | 0.71  | 0.321 | 1.41 (0.73, 2.72)  |
|  |           | CC | 29.6 | 34.4 |       |       | Reference          |
|  |           | CT | 38.3 | 45.3 | 0.02  | 1.000 | 0.98 (0.45, 2.11)  |
|  |           | TT | 32.1 | 20.3 | 1.28  | 0.192 | 1.83 (0.76, 4.43)  |
|  | rs1518110 | C  | 49.4 | 57.8 |       |       | Reference          |
|  |           | A  | 50.6 | 42.2 | 0.71  | 0.321 | 1.41 (0.73, 2.72)  |
|  |           | CC | 27.2 | 34.4 |       |       | Reference          |
|  |           | CA | 43.2 | 45.3 | 0.08  | 0.696 | 1.21 (0.56, 2.60)  |
|  |           | AA | 29.6 | 20.3 | 1.25  | 0.260 | 1.85 (0.75, 4.53)  |
|  | rs3021094 | T  | 87.7 | 92.2 |       |       | Reference          |
|  |           | G  | 12.3 | 7.8  | 0.38  | 0.422 | 1.66 (0.54, 5.13)  |
|  |           | TT | 75.3 | 85.9 |       |       | Reference          |
|  |           | TG | 23.5 | 12.5 | 2.14  | 0.131 | 2.14 (0.87, 5.28)  |
|  |           | GG | 1.2  | 1.6  | 0.411 | 0.521 | 0.90 (0.06, 14.76) |
|  | rs1800872 | G  | 46.9 | 54.7 |       |       | Reference          |
|  |           | T  | 53.1 | 45.3 | 2.28  | 0.121 | 1.79 (0.91, 3.54)  |
|  |           | GG | 25.9 | 29.7 |       |       | Reference          |
|  |           | GT | 42.0 | 50.0 | 0.01  | 1.000 | 0.96 (0.44, 2.11)  |
|  |           | TT | 32.1 | 20.3 | 1.11  | 0.253 | 1.81 (0.73, 4.5)   |
|  | rs1800896 | T  | 76.5 | 78.1 |       |       | Reference          |
|  |           | C  | 23.5 | 21.9 | 0     | 0.844 | 1.1 (0.5, 2.4)     |
|  |           | TT | 59.3 | 60.9 |       |       | Reference          |
|  |           | TC | 34.6 | 34.4 | 0.01  | 1.000 | 1.03 (0.51, 2.08)  |
|  |           | CC | 6.2  | 4.7  | 0     | 0.978 | 1.35 (0.30, 6.02)  |
|  | rs1800893 | C  | 75.3 | 76.6 |       |       | Reference          |
|  |           | T  | 24.7 | 23.4 | 0     | 1.000 | 1.07 (0.5, 2.31)   |
|  |           | CC | 56.8 | 57.8 |       |       | Reference          |
|  |           | CT | 37.0 | 35.9 | 0     | 1.000 | 1.05 (0.52, 2.10)  |
|  |           | TT | 6.2  | 6.3  | 0.119 | 0.729 | 1.01 (0.25, 4.01)  |
|  | rs6693899 | G  | 80.2 | 76.6 |       |       | Reference          |
|  |           | T  | 19.8 | 23.4 | 0.11  | 0.684 | 0.80 (0.36, 1.78)  |
|  |           | GG | 67.9 | 59.4 |       |       | Reference          |
|  |           | GT | 24.7 | 34.4 | 1.12  | 0.262 | 0.63 (0.30, 1.31)  |
|  |           | TT | 7.4  | 6.3  | 0.081 | 0.774 | 1.04 (0.27, 3.92)  |
|  | rs6703630 | C  | 92.6 | 92.2 |       |       | Reference          |
|  |           | T  | 7.4  | 7.8  | 0.05  | 0.822 | 0.94 (0.28, 3.25)  |
|  |           | CC | 86.4 | 82.8 |       |       | Reference          |

|              |            |           |      |      |       |       |                    |
|--------------|------------|-----------|------|------|-------|-------|--------------------|
|              |            | CT        | 12.3 | 17.2 | 0.31  | 0.481 | 0.69 (0.27, 1.74)  |
|              |            | TT        | 1.2  | 0.0  | -     | -     | -                  |
| <i>IL12B</i> | rs3212227  | T         | 56.8 | 64.1 |       |       | Reference          |
|              |            | G         | 43.2 | 35.9 | 0.51  | 0.398 | 1.36 (0.69, 2.66)  |
|              |            | TT        | 35.8 | 39.1 |       |       | Reference          |
|              |            | TG        | 40.7 | 48.4 | 0     | 0.854 | 0.92 (0.44, 1.9)   |
|              |            | GG        | 23.5 | 12.5 | 1.44  | 0.230 | 2.05 (0.77, 5.48)  |
|              | rs3213094  | C         | 56.8 | 64.1 |       |       | Reference          |
|              |            | T         | 43.2 | 35.9 | 0.51  | 0.398 | 1.36 (0.69, 2.66)  |
|              |            | CC        | 35.8 | 39.1 |       |       | Reference          |
|              |            | CT        | 42.0 | 48.4 | 0     | 1.000 | 0.95 (0.46, 1.95)  |
|              |            | TT        | 22.2 | 12.5 | 1.16  | 0.229 | 1.94 (0.72, 5.22)  |
|              | rs2569254  | C         | 91.4 | 89.1 |       |       | Reference          |
|              |            | T         | 8.6  | 10.9 | 0.03  | 0.778 | 0.77 (0.26, 2.32)  |
|              |            | CC        | 85.2 | 79.7 |       |       | Reference          |
|              |            | CT        | 12.3 | 17.2 | 0.36  | 0.477 | 0.67 (0.27, 1.70)  |
|              |            | TT        | 2.5  | 3.1  | 0.046 | 0.820 | 0.74 (0.1, 5.42)   |
|              | rs1433048  | A         | 87.7 | 87.5 |       |       | Reference          |
|              |            | G         | 12.3 | 12.5 | 0.05  | 1.000 | 0.99 (0.36, 2.66)  |
|              |            | AA        | 77.8 | 76.6 |       |       | Reference          |
|              |            | GA        | 19.8 | 21.9 | 0.01  | 0.837 | 0.89 (0.40, 2.00)  |
|              |            | GG        | 2.5  | 1.6  | 0.053 | 0.817 | 1.56 (0.14, 17.66) |
|              | rs730691   | T         | 53.1 | 48.4 |       |       | Reference          |
|              |            | C         | 46.9 | 51.6 | 0.15  | 0.618 | 0.83 (0.43, 1.60)  |
|              |            | TT        | 32.1 | 25.0 |       |       | Reference          |
|              |            | <b>TC</b> | 40.7 | 45.3 | 0.46  | 0.424 | 0.70 (0.32, 1.56)  |
|              |            | CC        | 27.2 | 29.7 | 0.29  | 0.508 | 0.71 (0.3, 1.71)   |
|              | rs17860508 | C         | 90.1 | 90.6 |       |       | Reference          |
|              |            | T         | 9.9  | 9.4  | 0.03  | 1.000 | 1.06 (0.35, 3.23)  |
|              |            | CC        | 80.2 | 79.7 |       |       | Reference          |
|              |            | CT        | 19.8 | 20.3 | 0.02  | 1.000 | 0.97 (0.43, 2.19)  |
|              |            | TT        | 0.0  | 0.0  | -     | -     | -                  |
|              | rs6887695  | G         | 60.5 | 59.4 |       |       | Reference          |
|              |            | C         | 39.5 | 40.6 | 0     | 1.000 | 0.96 (0.49, 1.86)  |
|              |            | GG        | 35.8 | 32.8 |       |       | Reference          |
|              |            | GC        | 48.1 | 51.6 | 0.05  | 0.713 | 0.86 (0.41, 1.77)  |
|              |            | CC        | 16.0 | 15.6 | 0.02  | 1.000 | 0.94 (0.35, 2.55)  |

rs id - Reference SNP cluster identification; OR - Odds ratio; CI = confidence interval
